# Supplementary material
Source: Springer Nature journal article supplement (https://www.springermedizin.de/resource/supplementary/12876_2009_322_MOESM1_ESM.pdf/9439160)
Supplement: MOESM1 [file 9439160]

**Addition file 1 ; Correlation between blood chemistries and biomarkers**

Significant  $p < 0.05$

| <b>Control</b>            |                     | <b>Total Bilirubin</b> | <b>Albumin</b> | <b>Globulin</b> | <b>AST</b> | <b>ALT</b> | <b>ALP</b> | <b>LOG CA19-9</b> | <b>LOG CEA</b> | <b>MMP-9</b> | <b>MMP-7</b> |
|---------------------------|---------------------|------------------------|----------------|-----------------|------------|------------|------------|-------------------|----------------|--------------|--------------|
| <b>LOG CA19-9</b>         | Pearson Correlation | -0.18                  | 0.03           | -0.33           | -0.13      | -0.21      | -0.42      | 1.00              | 0.30           | -0.07        | -0.25        |
|                           | Sig. (2-tailed)     | 0.34                   | 0.89           | 0.07            | 0.49       | 0.28       | 0.02       |                   | 0.14           | 0.70         | 0.22         |
| <b>LOG CEA</b>            | Pearson Correlation | 0.11                   | -0.54          | -0.11           | 0.02       | -0.04      | 0.34       | 0.30              | 1.00           | -0.02        | 0.27         |
|                           | Sig. (2-tailed)     | 0.61                   | 0.01           | 0.62            | 0.92       | 0.86       | 0.10       | 0.14              |                | 0.93         | 0.24         |
| <b>MMP-9</b>              | Pearson Correlation | -0.08                  | 0.10           | 0.11            | -0.10      | 0.03       | 0.00       | -0.07             | -0.02          | 1.00         | -0.23        |
|                           | Sig. (2-tailed)     | 0.66                   | 0.61           | 0.57            | 0.62       | 0.88       | 0.99       | 0.70              | 0.93           |              | 0.26         |
| <b>MMP-7</b>              | Pearson Correlation | 0.10                   | -0.34          | 0.06            | 0.27       | 0.26       | 0.53       | -0.25             | 0.27           | -0.23        | 1.00         |
|                           | Sig. (2-tailed)     | 0.64                   | 0.10           | 0.77            | 0.19       | 0.22       | 0.01       | 0.22              | 0.24           | 0.26         |              |
| <b>Cholangiocarcinoma</b> |                     | <b>Total Bilirubin</b> | <b>Albumin</b> | <b>Globulin</b> | <b>AST</b> | <b>ALT</b> | <b>ALP</b> | <b>LOG CA19-9</b> | <b>LOG CEA</b> | <b>MMP-9</b> | <b>MMP-7</b> |
| <b>LOG CA19-9</b>         | Pearson Correlation | 0.03                   | -0.14          | 0.20            | -0.01      | -0.09      | -0.02      | 1.00              | 0.14           | -0.11        | 0.31         |
|                           | Sig. (2-tailed)     | 0.86                   | 0.36           | 0.20            | 0.94       | 0.57       | 0.90       |                   | 0.44           | 0.46         | 0.07         |
| <b>LOG CEA</b>            | Pearson Correlation | 0.17                   | 0.04           | -0.05           | -0.35      | 0.02       | -0.04      | 0.14              | 1.00           | -0.08        | -0.07        |
|                           | Sig. (2-tailed)     | 0.34                   | 0.82           | 0.79            | 0.05       | 0.90       | 0.81       | 0.44              |                | 0.66         | 0.75         |
| <b>MMP-9</b>              | Pearson Correlation | -0.19                  | 0.00           | 0.25            | -0.10      | -0.09      | 0.10       | -0.11             | -0.08          | 1.00         | -0.17        |
|                           | Sig. (2-tailed)     | 0.23                   | 0.99           | 0.11            | 0.51       | 0.57       | 0.51       | 0.46              | 0.66           |              | 0.33         |
| <b>MMP-7</b>              | Pearson Correlation | 0.20                   | -0.04          | 0.15            | 0.24       | -0.04      | 0.02       | 0.31              | -0.07          | -0.17        | 1.00         |
|                           | Sig. (2-tailed)     | 0.28                   | 0.84           | 0.42            | 0.19       | 0.82       | 0.91       | 0.07              | 0.75           | 0.33         |              |
